# Supplementary material for: A systematic comparison reveals substantial differences in chromosomal versus episomal encoding of enhancer activity
Source: PubMed Central journal article supplement — Genome Res. 2017 Jan;27(1):38–52. doi: 10.1101/gr.212092.116 (PMC5204343; doi:10.1101/gr.212092.116), 2017-01

**Supplemental Figure S1.** Validating lentiviral infection in several different cell lines. pLS-mP or pLS-SV40-mP infection results following 48 hours for K562, H1 human embryonic stem cells (H1 hESC), HeLa S3, T47D, and Sk-n-sh cells treated with retinoic acid (Sk-n-sh-RA).

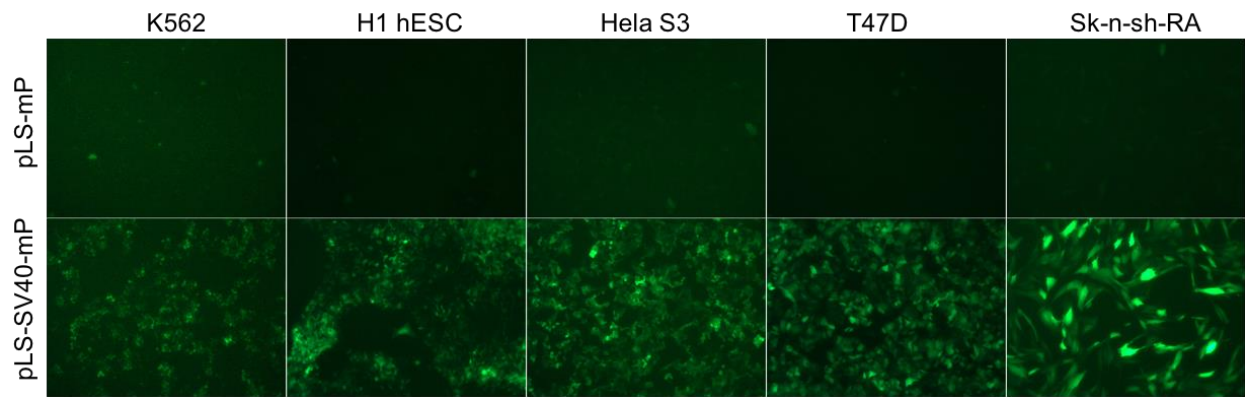

Supplement: supp_gr.212092.116_Supplemental_Figure_S1.pdf [file supp_gr.212092.116_Supplemental_Figure_S1.pdf]
