# Supplementary material for: A systematic comparison reveals substantial differences in chromosomal versus episomal encoding of enhancer activity
Source: PubMed Central journal article supplement — Genome Res. 2017 Jan;27(1):38–52. doi: 10.1101/gr.212092.116 (PMC5204343; doi:10.1101/gr.212092.116), 2017-01

**Supplemental Figure S2.** Luciferase assay for two positive (pos1 and pos2) and two negative (neg1 and neg2) control sequences. The reporter vectors and the empty vector (pGL4.23) were transfected into HepG2 cells, and the enhancer activity was measured as relative luciferase activity compared to Renilla luciferase expression following 24 hours.

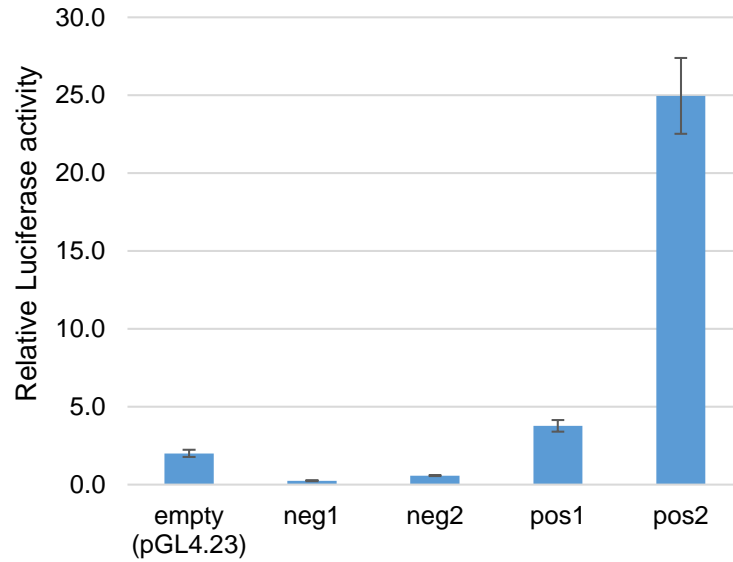

Supplement: supp_gr.212092.116_Supplemental_Figure_S2.pdf [file supp_gr.212092.116_Supplemental_Figure_S2.pdf]
