# Supplementary material for: A systematic comparison reveals substantial differences in chromosomal versus episomal encoding of enhancer activity
Source: PubMed Central journal article supplement — Genome Res. 2017 Jan;27(1):38–52. doi: 10.1101/gr.212092.116 (PMC5204343; doi:10.1101/gr.212092.116), 2017-01

**Supplemental Figure S3.** MPRA library cloning strategy. GFP, green fluorescent protein, minP, minimal promoter; *Sbf1*, *EcoRI* restriction sites. The lenti vector pLS-mP is cut with *Sbf1* and *EcoRI* to remove the minimal promoter and GFP. The enhancer/barcode agilent array is amplified with adaptor primers, and these PCR products are cloned into the pLS-mP backbone using NEBuilder HiFi Assembly mix. Cloning disrupts the original *Sbf1* and *EcoRI* sites. This initial library can be sequenced to validate its accuracy and complexity. The library is then digested with *Sbf1* and *EcoRI* to re-insert the minimal promoter and GFP between the enhancer and the barcode with a sticky-end ligation.

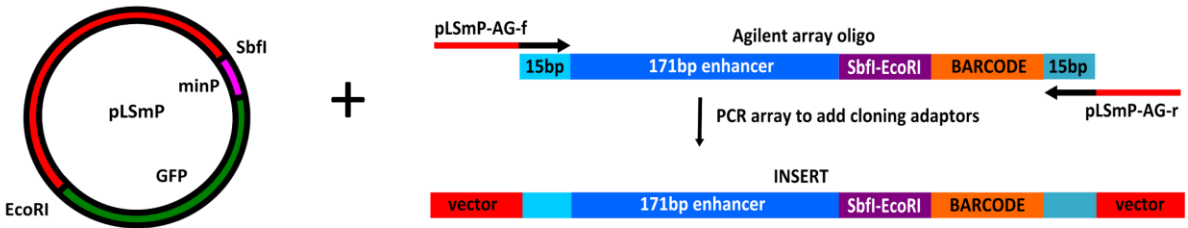

Cut pLSmP with *Sbf1* and *EcoRI*, remove minP/GFP and replace with enhancer/barcode inserts

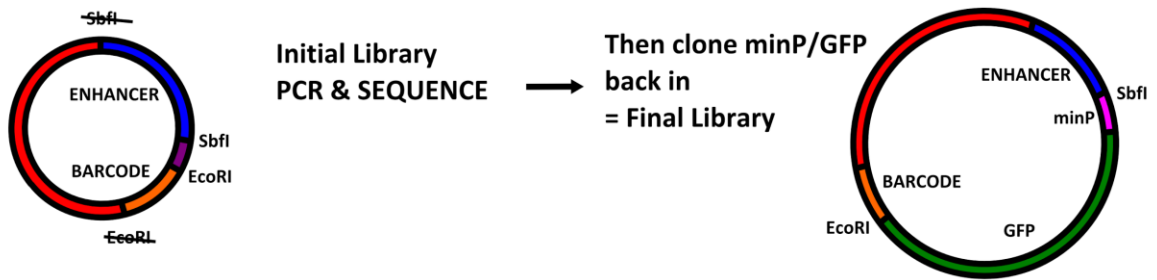

Supplement: supp_gr.212092.116_Supplemental_Figure_S3.pdf [file supp_gr.212092.116_Supplemental_Figure_S3.pdf]
