# Supplementary material for: A systematic comparison reveals substantial differences in chromosomal versus episomal encoding of enhancer activity
Source: PubMed Central journal article supplement — Genome Res. 2017 Jan;27(1):38–52. doi: 10.1101/gr.212092.116 (PMC5204343; doi:10.1101/gr.212092.116), 2017-01

**Supplemental Figure S5.** Analysis of wild-type integrase (WT-IN) and mutant integrase (MT-IN) virus infection conditions. (A) DNA titer for pLS-SV40-mP using either a WT-IN and MT-IN virus as determined by qPCR with primers against WPRE compared to genomic primers for the intronic region of the *LIPC* gene. Three different volumes (1, 5, and 25  $\mu$ L per well of a 24-well plate) of lentivirus were analyzed at days 2-5 days. (B) Analysis of total viral DNA (WPRE) and unintegrated viral DNA (2-LTR circular DNA) for WT-IN library 4 days after infection and MT-IN library 3 days after infection using qPCR. The relative amount of viral DNA was measured using primers that target an intronic region of the *LIPC* gene.

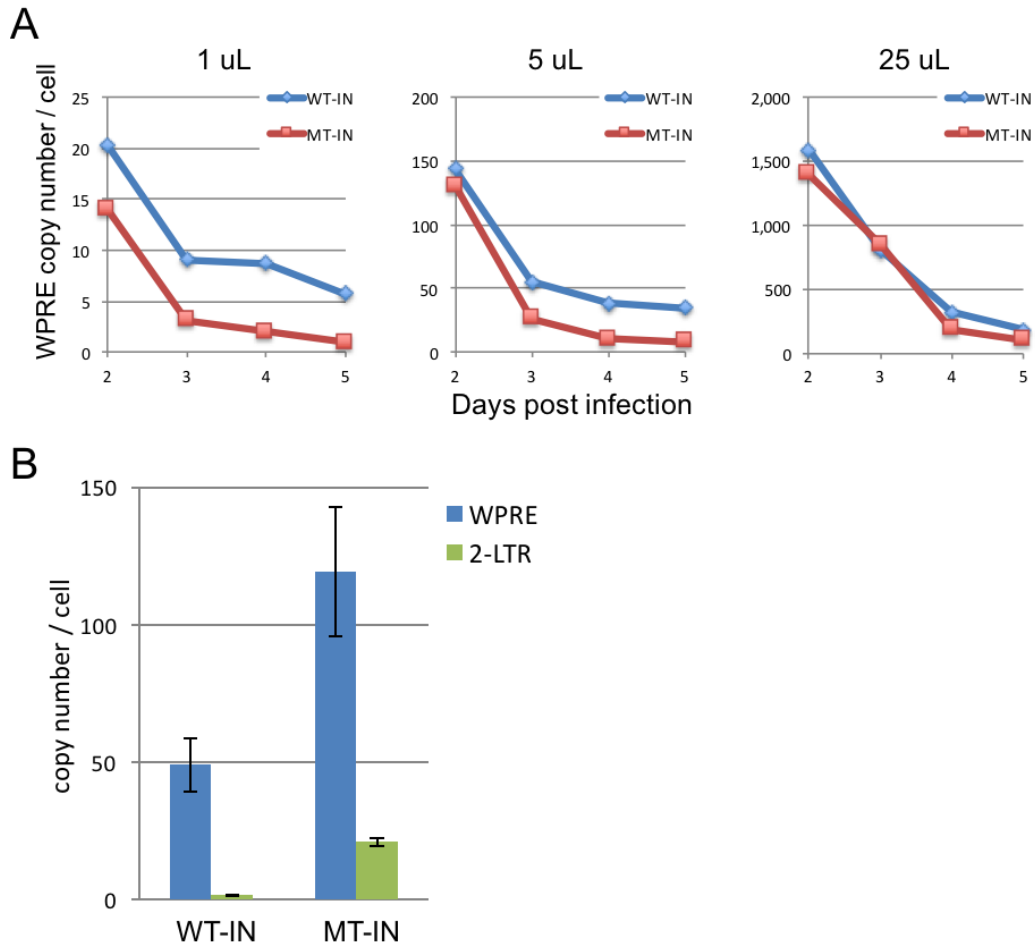

Supplement: supp_gr.212092.116_Supplemental_Figure_S5.pdf [file supp_gr.212092.116_Supplemental_Figure_S5.pdf]
