# Supplementary material for: A systematic comparison reveals substantial differences in chromosomal versus episomal encoding of enhancer activity
Source: PubMed Central journal article supplement — Genome Res. 2017 Jan;27(1):38–52. doi: 10.1101/gr.212092.116 (PMC5204343; doi:10.1101/gr.212092.116), 2017-01

**Supplemental Figure S6.** Correlation (Pearson/p-rho and Spearman/s-rho) of DNA tag counts (left column), RNA tag counts (middle column) as well as RNA/DNA ratios (right column) for pairwise comparisons of three mutant-integrase (MT) library replicates (rows). These are for individual barcodes, *i.e.* before summing across barcodes representing the same candidate enhancer sequence.

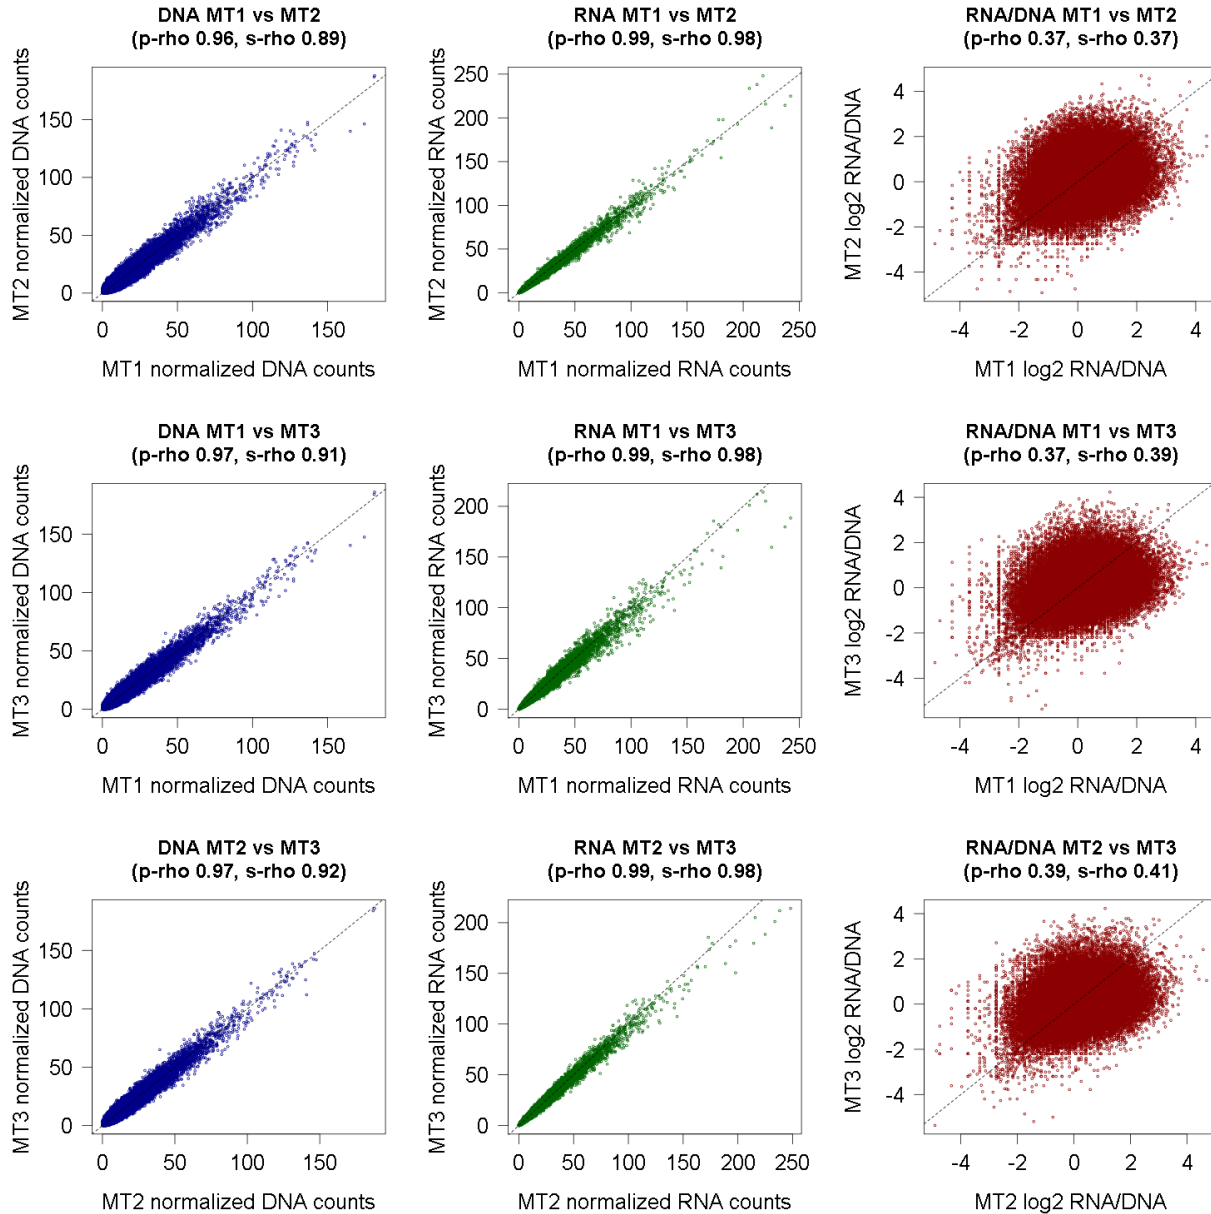

Supplement: supp_gr.212092.116_Supplemental_Figure_S6.pdf [file supp_gr.212092.116_Supplemental_Figure_S6.pdf]
