# Supplementary material for: A systematic comparison reveals substantial differences in chromosomal versus episomal encoding of enhancer activity
Source: PubMed Central journal article supplement — Genome Res. 2017 Jan;27(1):38–52. doi: 10.1101/gr.212092.116 (PMC5204343; doi:10.1101/gr.212092.116), 2017-01

**Supplemental Figure S8.** Histogram of the number of barcodes per insert across all 2,440 designed candidate enhancer sequences. We observe barcodes for all 2,440 inserts in each of the six experiments. On average, we observe 59-62 barcodes per insert (minimum 8-9, maximum 97-98).

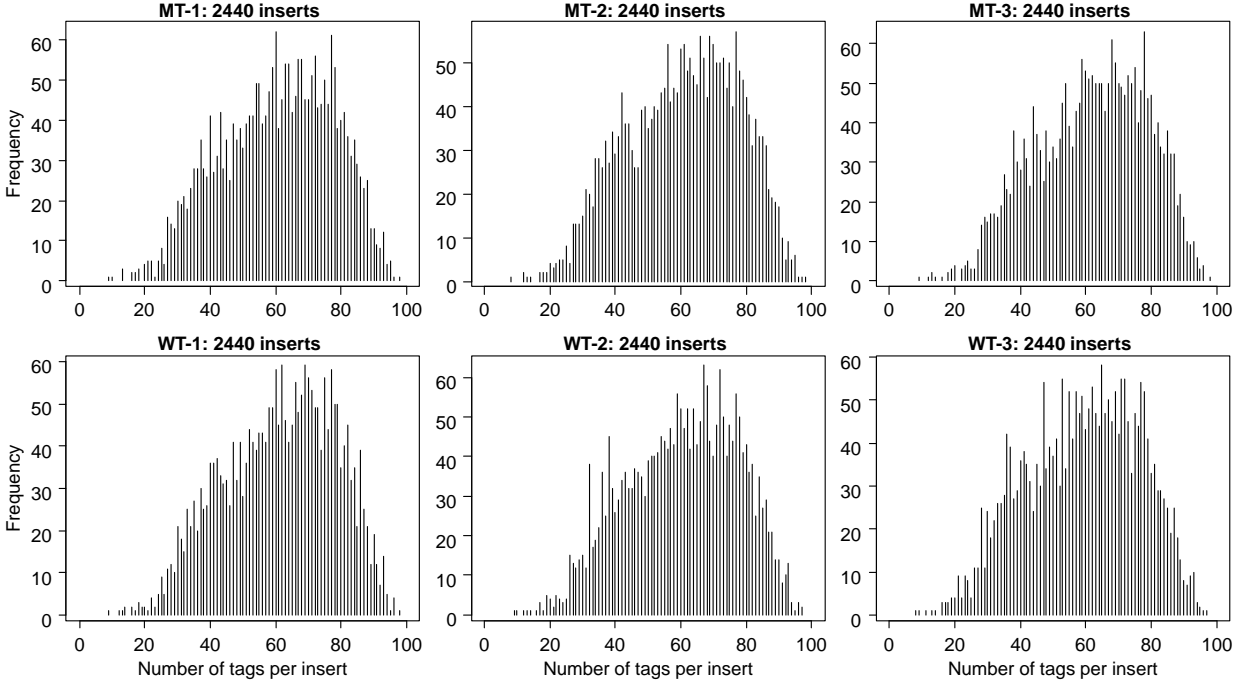

Supplement: supp_gr.212092.116_Supplemental_Figure_S8.pdf [file supp_gr.212092.116_Supplemental_Figure_S8.pdf]
