# Supplementary material for: A systematic comparison reveals substantial differences in chromosomal versus episomal encoding of enhancer activity
Source: PubMed Central journal article supplement — Genome Res. 2017 Jan;27(1):38–52. doi: 10.1101/gr.212092.116 (PMC5204343; doi:10.1101/gr.212092.116), 2017-01

**Supplemental Figure 9. Reproducibility of counts and ratios across technical replicates.** Correlation of DNA tag counts (left/blue), RNA tag counts (middle/green) as well as RNA/DNA ratios (right/red) for pairwise comparisons of the three mutant-integrase (MT) library replicates (A) and the three wild-type-integrase (WT) library replicates (B) along the rows. Both the counts and the ratios are calculated from RNA and DNA counts that are summed across ~60 barcodes representing a given candidate enhancer sequence and represented in a given experiment.

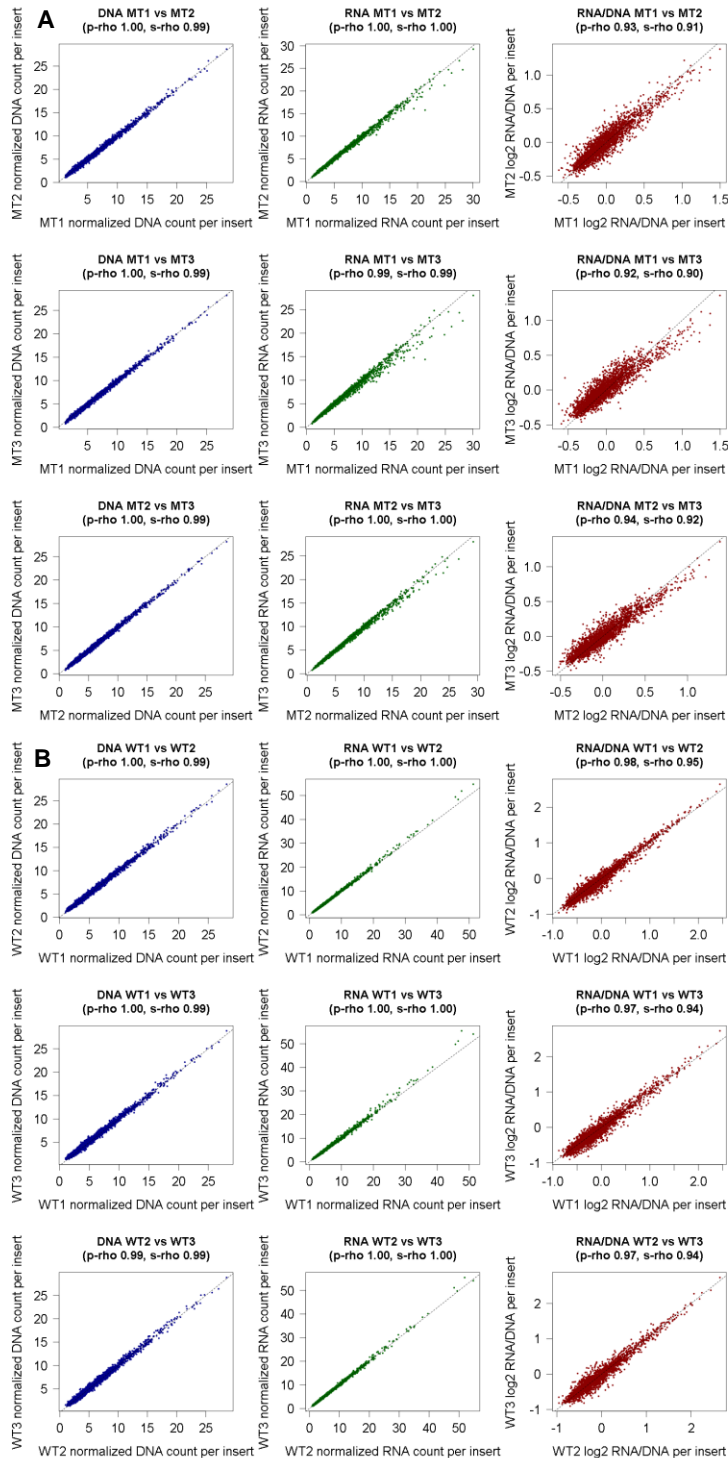

Supplement: supp_gr.212092.116_Supplemental_Figure_S9.pdf [file supp_gr.212092.116_Supplemental_Figure_S9.pdf]
