# Supplementary material for: A systematic comparison reveals substantial differences in chromosomal versus episomal encoding of enhancer activity
Source: PubMed Central journal article supplement — Genome Res. 2017 Jan;27(1):38–52. doi: 10.1101/gr.212092.116 (PMC5204343; doi:10.1101/gr.212092.116), 2017-01

**Supplemental Figure S10.** Effect of the number of barcodes averaged per insert on the correlation of experimental replicates for mutant (MT) and wild-type integrase (WT) experiments. Intervals indicate the mean, minimum and maximum values observed for pairwise Spearman correlations of the three replicates. Dashed lines indicate the average number of barcodes per insert as observed across all six experiments. The left plot is with setting a maximum number of tags per insert. The right plot is with fixing an exact number of tags per insert.

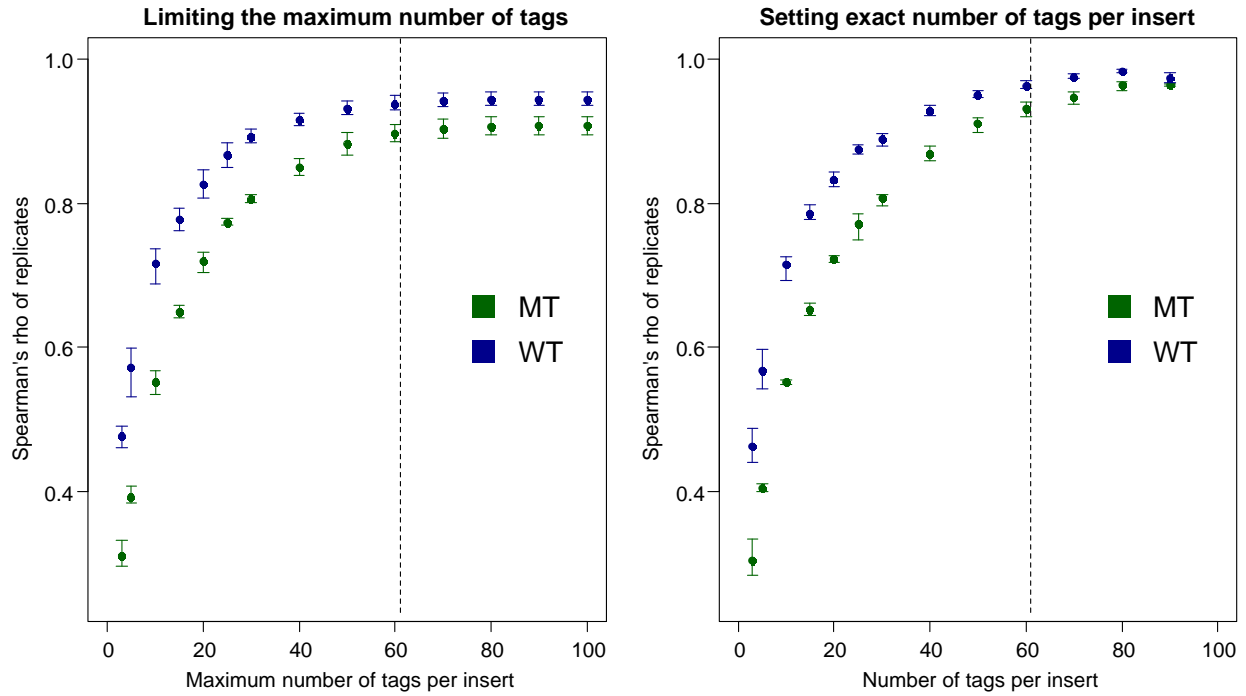

Supplement: supp_gr.212092.116_Supplemental_Figure_S10.pdf [file supp_gr.212092.116_Supplemental_Figure_S10.pdf]
