# Supplementary material for: A systematic comparison reveals substantial differences in chromosomal versus episomal encoding of enhancer activity
Source: PubMed Central journal article supplement — Genome Res. 2017 Jan;27(1):38–52. doi: 10.1101/gr.212092.116 (PMC5204343; doi:10.1101/gr.212092.116), 2017-01

**Supplemental Figure S11.** Bean plot of MT (left) and WT (right) RNA/DNA ratios split by design category. The four classes of putative enhancer elements are: Regions of FOXA1, FOXA2 or HNF4A binding that overlap H3K27ac and EP300 calls as well as at least one of three factors RAD21, CHD2 or SMC3 (type 1); Regions like in 1 but with no RAD21, CHD2 or SMC3 overlapping (type 2); EP300 peak regions overlapping H3K27ac as well as at least one of the mentioned factors, but without peaks in FOXA1, FOXA2 or HNF4A (type 3); Regions like in 3 but with RAD21, CHD2 or SMC3 overlapping (type 4). As shown here and in Fig. 3A, we do not observe major differences between design types, either with respect to activity or MT vs. WT.

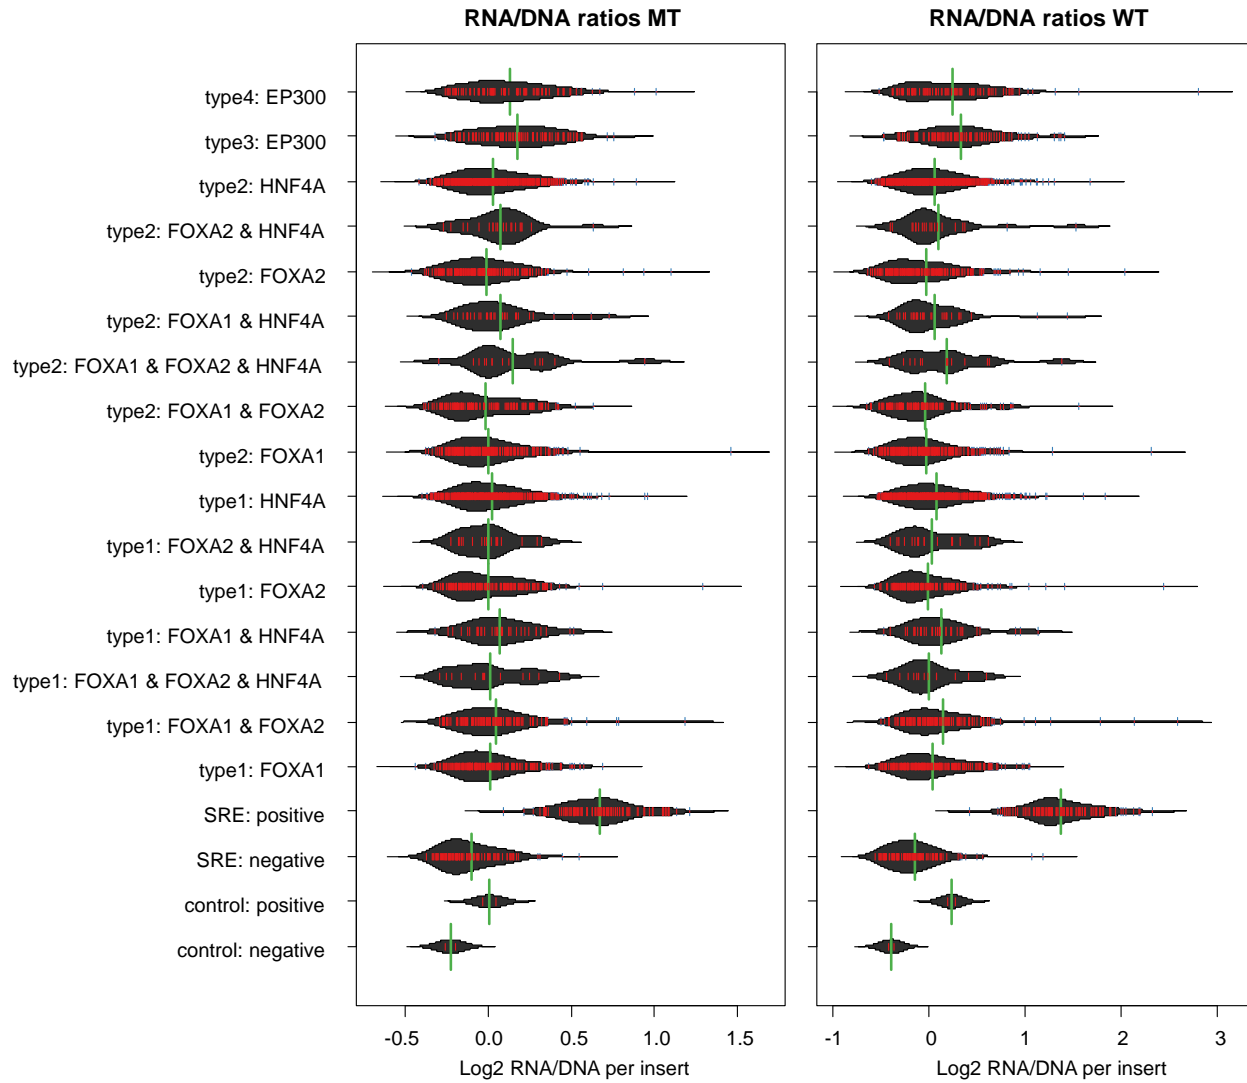

Supplement: supp_gr.212092.116_Supplemental_Figure_S11.pdf [file supp_gr.212092.116_Supplemental_Figure_S11.pdf]
