# Supplementary material for: A systematic comparison reveals substantial differences in chromosomal versus episomal encoding of enhancer activity
Source: PubMed Central journal article supplement — Genome Res. 2017 Jan;27(1):38–52. doi: 10.1101/gr.212092.116 (PMC5204343; doi:10.1101/gr.212092.116), 2017-01

**Supplemental Figure S12.** Distribution of RNA/DNA ratios for MT (left) and WT (right) split by HepG2 ChromHMM states. 15-state ChromHMM annotations (top) were obtained from the NIH RoadMap Epigenomics analysis. 7-state ChromHMM annotation (bottom) was downloaded from the ENCODE project and had not been annotated with further labels. Inserts not represented in the available annotations (e.g. synthetic controls) were assigned to UnDef.

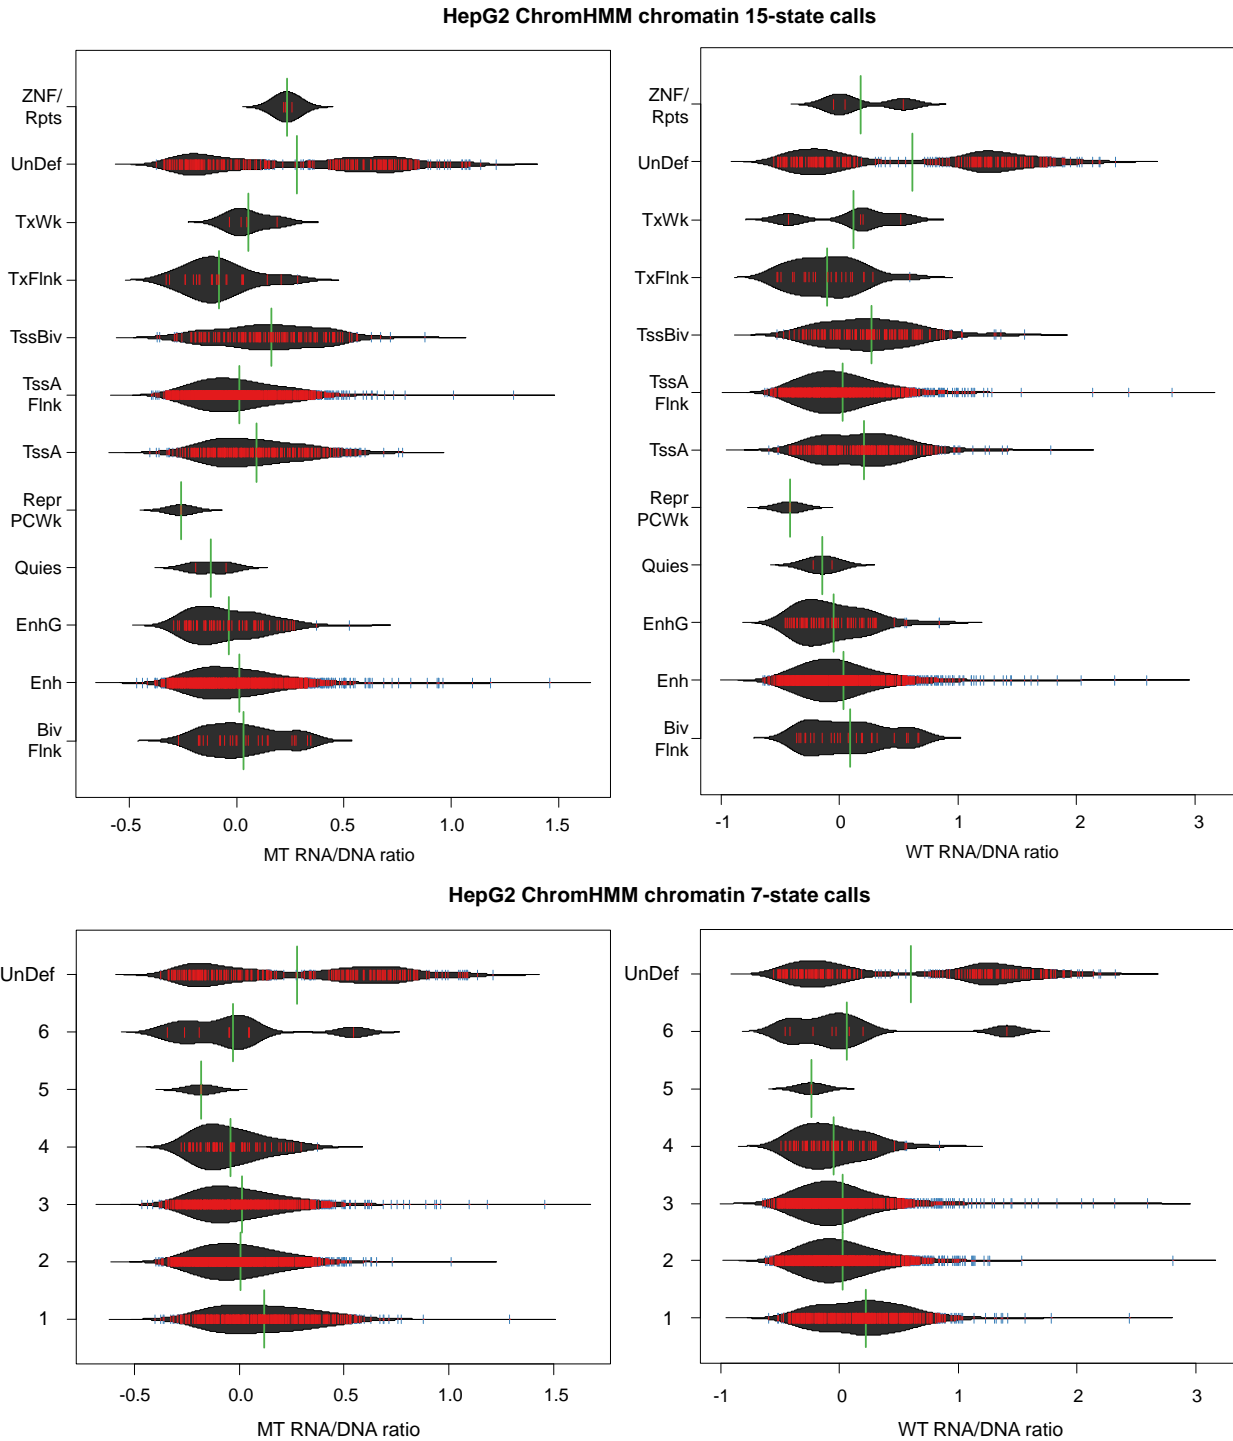

Supplement: supp_gr.212092.116_Supplemental_Figure_S12.pdf [file supp_gr.212092.116_Supplemental_Figure_S12.pdf]
