# Supplementary material for: A systematic comparison reveals substantial differences in chromosomal versus episomal encoding of enhancer activity
Source: PubMed Central journal article supplement — Genome Res. 2017 Jan;27(1):38–52. doi: 10.1101/gr.212092.116 (PMC5204343; doi:10.1101/gr.212092.116), 2017-01

**Supplemental Figure S13.** Distribution of RNA/DNA ratios for MT (left) and WT (right) split by HepG2 SegWay chromatin states. Chromatin labels were downloaded from the ENCODE project. Inserts not represented in the available annotations were assigned to UnDef.

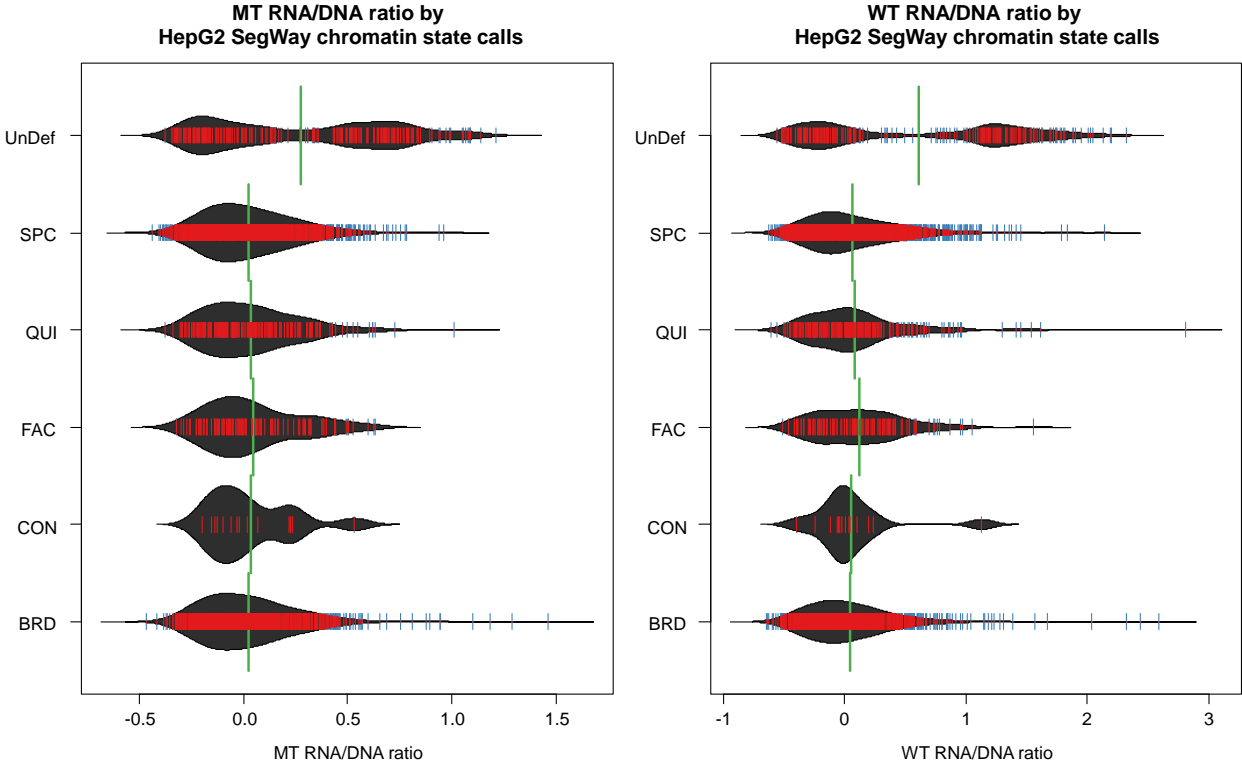

Supplement: supp_gr.212092.116_Supplemental_Figure_S13.pdf [file supp_gr.212092.116_Supplemental_Figure_S13.pdf]
