# Supplementary material for: A systematic comparison reveals substantial differences in chromosomal versus episomal encoding of enhancer activity
Source: PubMed Central journal article supplement — Genome Res. 2017 Jan;27(1):38–52. doi: 10.1101/gr.212092.116 (PMC5204343; doi:10.1101/gr.212092.116), 2017-01

**Supplemental Figure S15.** Distribution of RNA/DNA ratios for the MT (left) and WT (right) experiments split by SegWay chromatin states of the UCSC supertrack. Inserts not represented in the available annotations were assigned to UnDef.

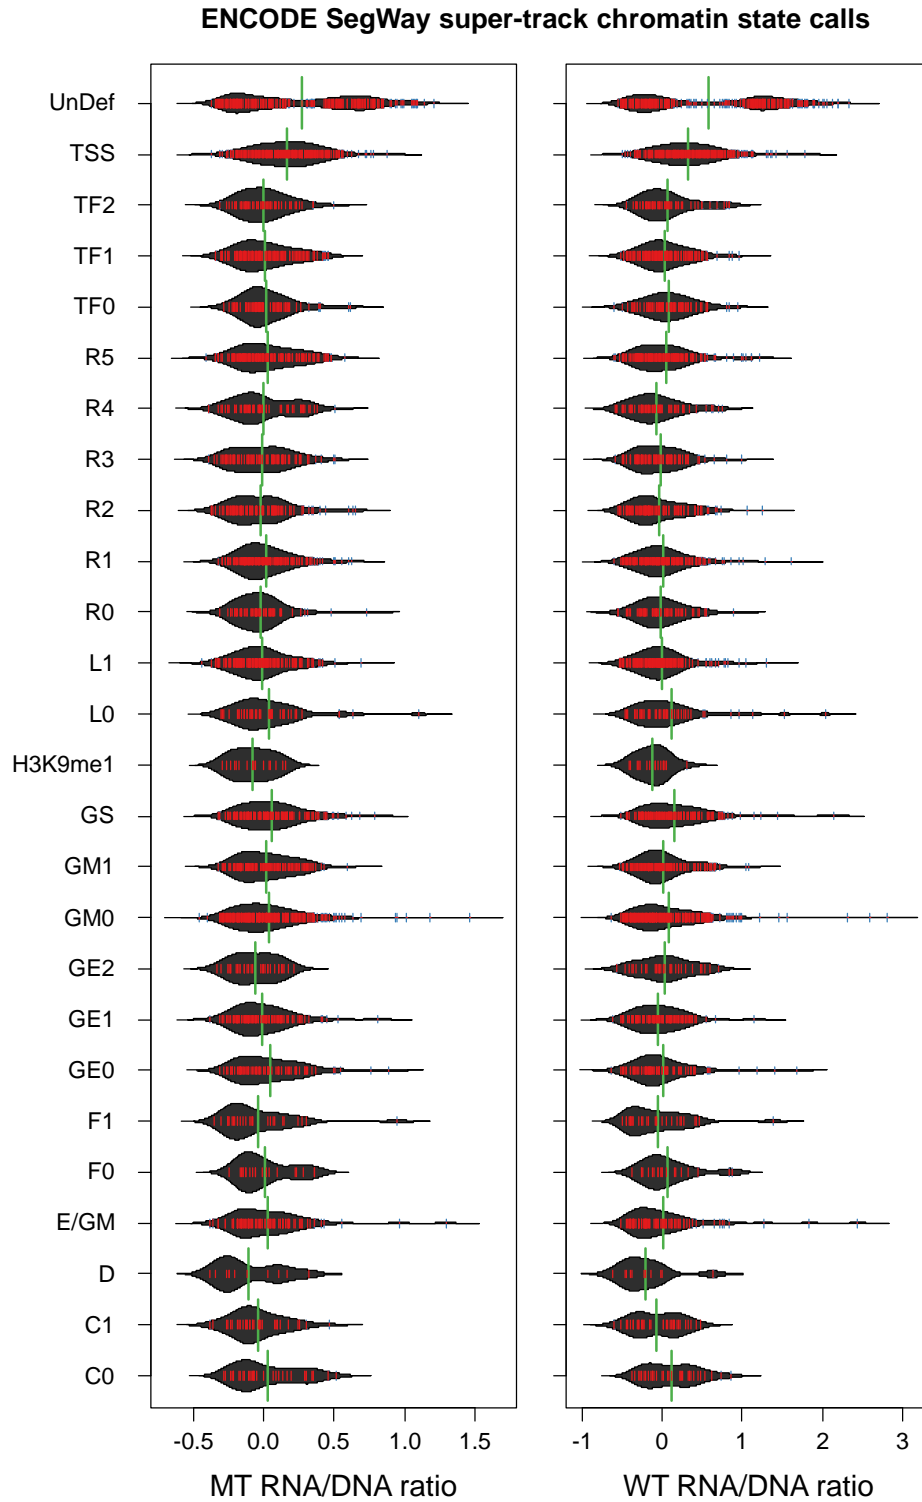

Supplement: supp_gr.212092.116_Supplemental_Figure_S15.pdf [file supp_gr.212092.116_Supplemental_Figure_S15.pdf]
