# Supplementary material for: A systematic comparison reveals substantial differences in chromosomal versus episomal encoding of enhancer activity
Source: PubMed Central journal article supplement — Genome Res. 2017 Jan;27(1):38–52. doi: 10.1101/gr.212092.116 (PMC5204343; doi:10.1101/gr.212092.116), 2017-01

**Supplemental Figure S16.** Density plots of RNA/DNA ratios: (A) RNA/DNA ratios observed between the MT and WT experiments with dashed lines marking the average value of the two negative controls. (B) Overlay of the RNA/DNA ratios of MT and WT experiments after normalizing to the average of the two negative controls. (C-D) Density plots of the WT RNA/DNA ratios by design categories and separating promoter (defined as within 1kb of a TSS) and non-promoter sequences.

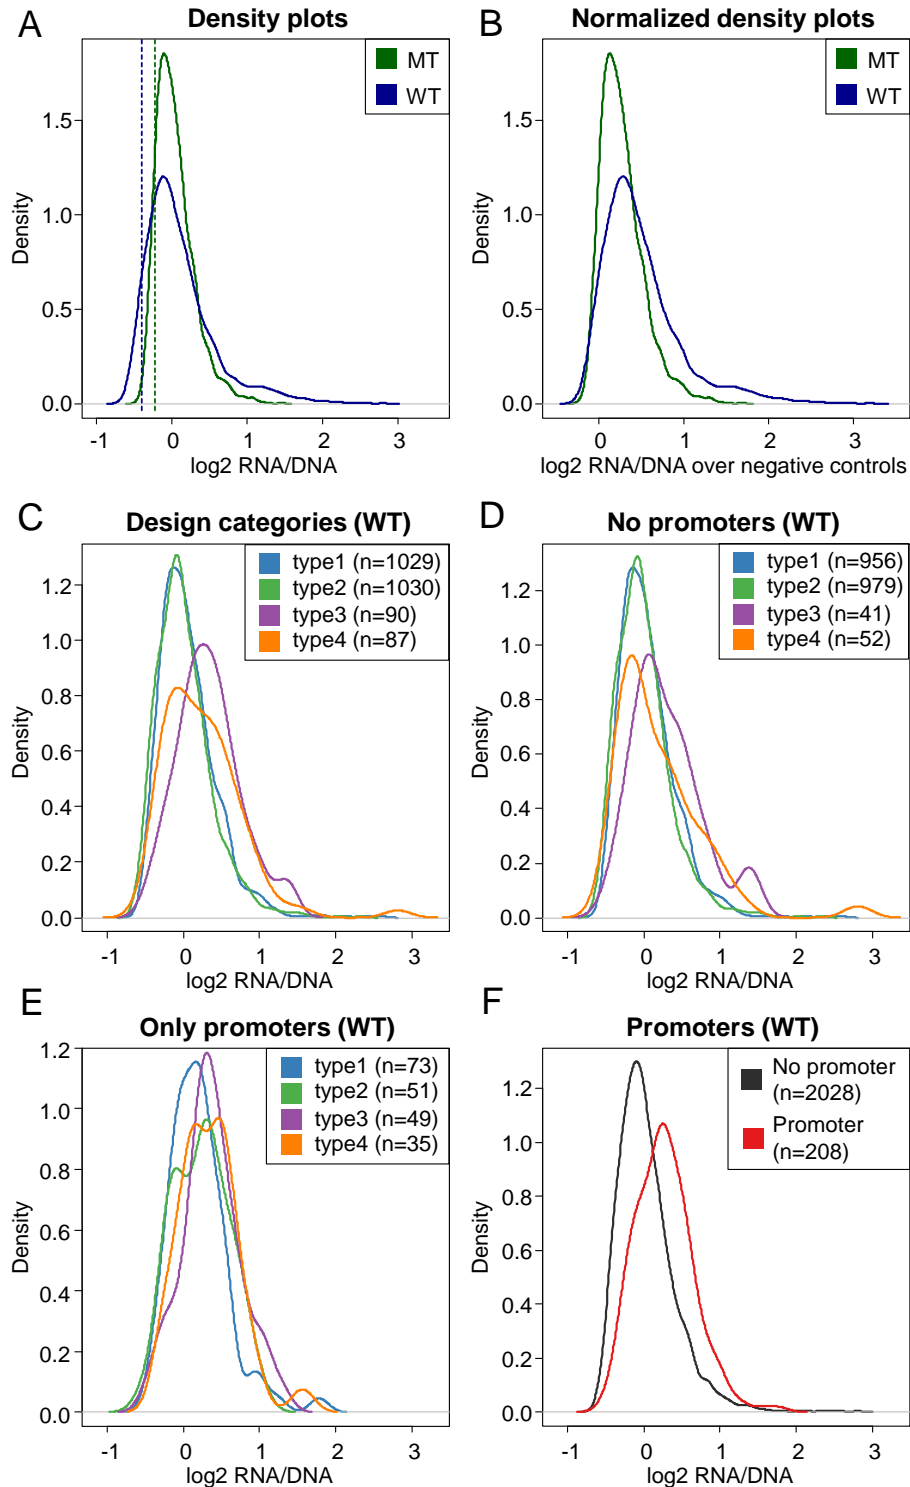

Supplement: supp_gr.212092.116_Supplemental_Figure_S16.pdf [file supp_gr.212092.116_Supplemental_Figure_S16.pdf]
