# Supplementary material for: A systematic comparison reveals substantial differences in chromosomal versus episomal encoding of enhancer activity
Source: PubMed Central journal article supplement — Genome Res. 2017 Jan;27(1):38–52. doi: 10.1101/gr.212092.116 (PMC5204343; doi:10.1101/gr.212092.116), 2017-01

**Supplemental Figure S20.** Spearman correlation coefficients ( $R^2$ ) of measured non-control insert activity with 64 LS-GKM models trained from HepG2 ChIP-Seq data. WT RNA/DNA ratios correlate better with annotations than the respective MT values. The left panel highlights the top correlated annotations for WT and MT ratios. The right panel highlights annotations with the largest difference in  $R^2$  values between MT and WT.

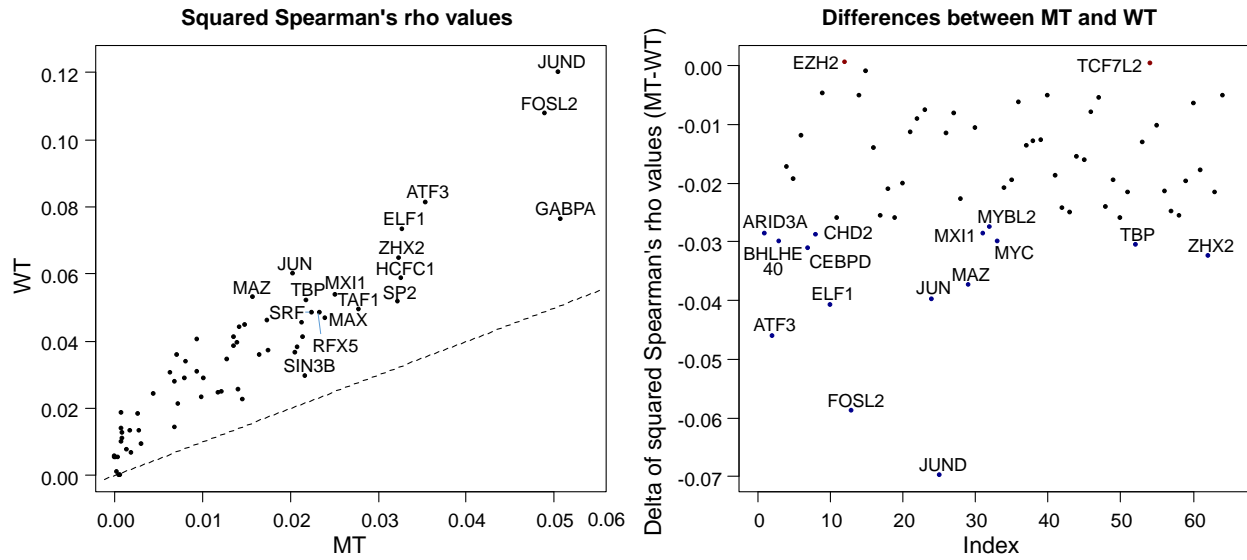

Supplement: supp_gr.212092.116_Supplemental_Figure_S20.pdf [file supp_gr.212092.116_Supplemental_Figure_S20.pdf]
