# Supplementary material for: A systematic comparison reveals substantial differences in chromosomal versus episomal encoding of enhancer activity
Source: PubMed Central journal article supplement — Genome Res. 2017 Jan;27(1):38–52. doi: 10.1101/gr.212092.116 (PMC5204343; doi:10.1101/gr.212092.116), 2017-01

**Supplemental Figure S21.** Coefficients for a lasso model that uses genomic annotations as well as LS-GKM scores to predict RNA/DNA ratios for MT (panel A), WT (panel B) and MT-WT (panel C). Models were fit as described in the methods and summarized in Fig. S17. In addition, the 64 HepG2 ChIP-seq derived LS-GKM model scores were included as predictors (Mod-prefix).

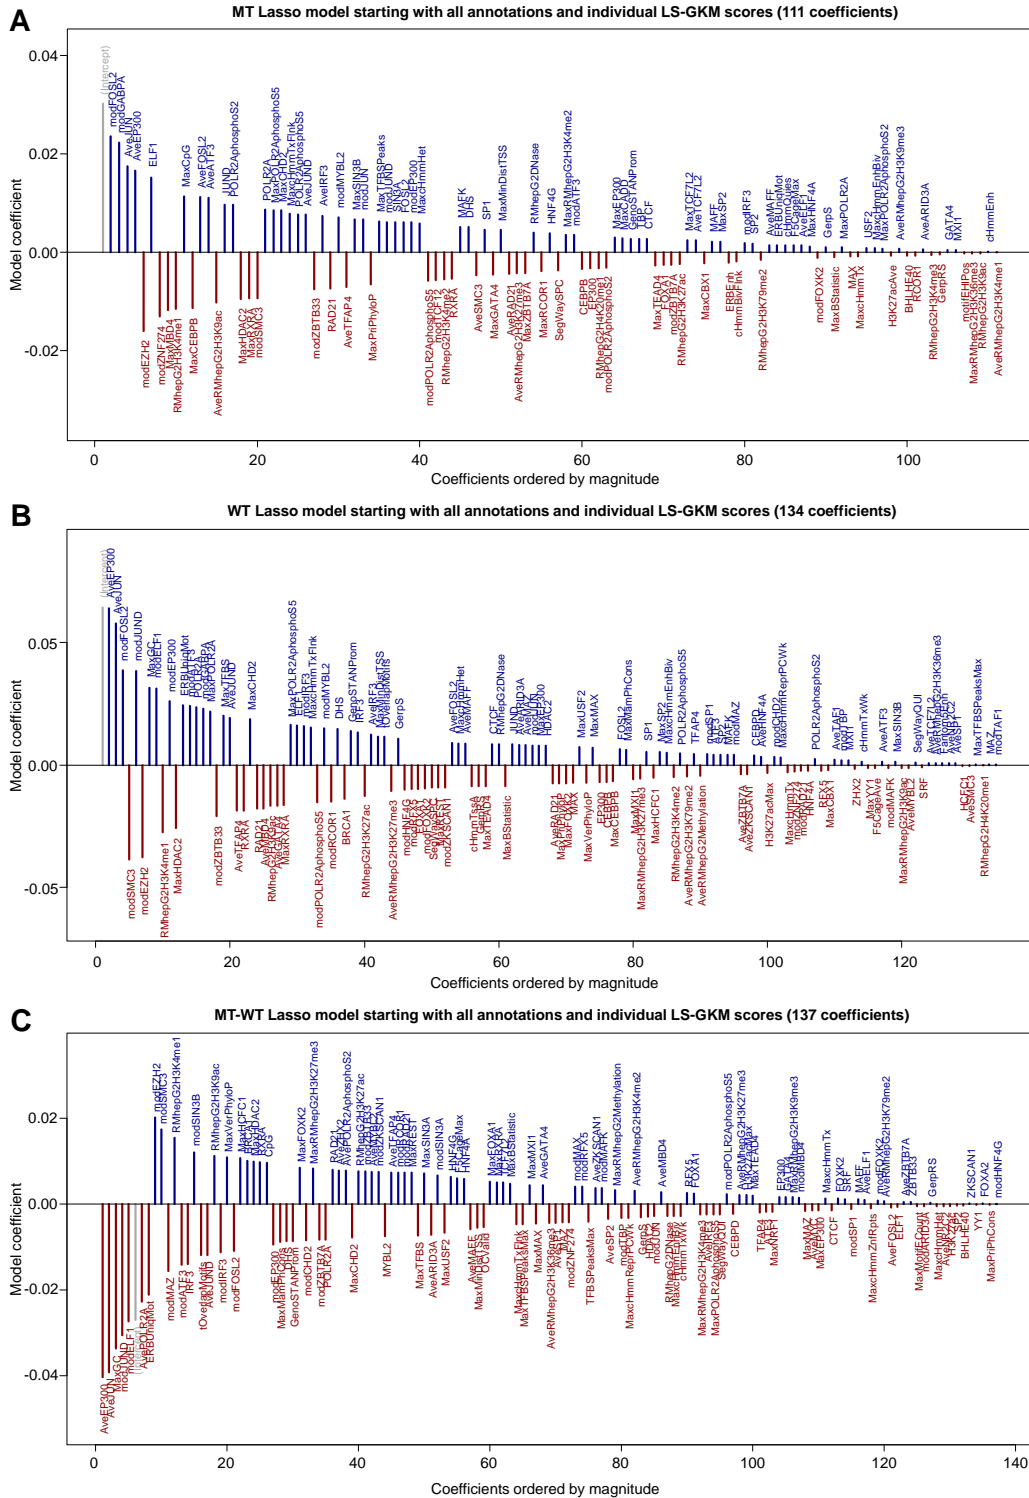

Supplement: supp_gr.212092.116_Supplemental_Figure_S21.pdf [file supp_gr.212092.116_Supplemental_Figure_S21.pdf]
