# Supplementary material for: A systematic comparison reveals substantial differences in chromosomal versus episomal encoding of enhancer activity
Source: HighWire-hosted journal article supplement (doi:10.1101/gr.212092.116), 2016-11-09
Supplement: Supplemental_Table_S2.docx [file Supplemental_Table_S2.docx]

**Supplemental Table S2.** Performance of pooled sequence models measured as Spearman R2 with RNA/DNA ratios of MT and WT experiments (excluding controls). The column "gkmSVM" refers to the sequence-based model trained from combining individual ChIP-seq binding factors described by M Ghandi & D Lee et al. ([Ghandi et al. 2014](#_ENREF_16)). JUND is the LS-GKM model trained only on JUND ChIP-seq peaks. This is the model showing the highest correlation with MT and WT RNA/DNA ratios. "Top 2", "Top 3", "Top 5", "Top 10", "Top 15" and "All Lasso" LS-GKM models were trained on the pooled ChIP-seq data underlying the individual TF LS-GKM models selected by linear Lasso regression. The 37 LS-GKM scores for MT (in the order of absolute coefficients) are JUND, FOSL2, GABPA, EZH2, MYBL2, SMC3, CEBPB, FOXA2, JUN, ATF3, ZBTB33, ELF1, ZNF274, SIN3B, ZBTB7A, FOXA1, SP2, RAD21, HNF4G, POLR2A, POLR2AphosphoS5, TFAP4, NR2C2, SRF, RCOR1, IRF3, POLR2AphosphoS2, HCFC1, TCF12, RFX5, MAFF, FOXK2, BRCA1, USF2, NRF1, TEAD4, and TCF7L2. The 34 scores for WT are JUND, FOSL2, EZH2, SMC3, JUN, ATF3, GABPA, ELF1, FOXA2, ZBTB33, MYBL2, CHD2, POLR2AphosphoS5, HNF4G, IRF3, FOXA1, RCOR1, MAZ, SP2, RAD21, RFX5, ARID3A, NR2C2, CEBPB, FOXK2, TFAP4, POLR2AphosphoS2, SIN3A, SRF, POLR2A, TAF1, TEAD4, ZBTB7A, and ZKSCAN1. The positive coefficients are (in this order) for MT are JUND, FOSL2, GABPA, MYBL2, JUN, ATF3, ELF1, SIN3B, SP2, SRF, IRF3, HCFC1, MAFF, BRCA1, and TCF7L2 and for WT positive coefficients are JUND, FOSL2, JUN, ATF3, GABPA, ELF1, MYBL2, CHD2, IRF3, MAZ, SP2, ARID3A, SRF TAF1, and ZBTB7A.

| **Experiment** | **gkmSVM** | **JUND** | **Top 2** | **Top 3** | **Top 5** | **Top 10** | **Top 15** | **All** |
| --- | --- | --- | --- | --- | --- | --- | --- | --- |
| WT | 7.58% | 12.01% | 12.09% | 11.24% | 9.09% | 5.91% | 6.11% | 4.30% |
| ***Pos. coefficients*** | | **Top 2** | **Top 3** | **Top 5** | **Top 10** | **Top 15** |  |
|  |  | 12.09% | 12.25% | 13.33% | 12.93% | 10.72% |  |
| **Experiment** | **gkmSVM** | **JUND** | **Top 2** | **Top 3** | **Top 5** | **Top 10** | **Top 15** | **All** |
| MT | 3.95% | 5.04% | 5.16% | 5.78% | 4.86% | 1.24% | 1.40% | 1.17% |
| ***Pos. coefficients*** | | **Top 2** | **Top 3** | **Top 5** | **Top 10** | **Top 15** |  |
|  |  | 5.16% | 5.78% | 5.36% | 5.63% | 5.12% |  |
