# Supplementary material for: A systematic comparison reveals substantial differences in chromosomal versus episomal encoding of enhancer activity
Source: HighWire-hosted journal article supplement (doi:10.1101/gr.212092.116), 2016-11-09
Supplement: Supplemental_Table_S3.docx [file Supplemental_Table_S3.docx]

**Supplemental Table S3.** Primer sequences used for cloning, barcode amplification and sequencing.

| **Name** | **Sequence** |
| --- | --- |
| *Cloning adaptors:* |  |
| pLSmP-AG-f | GGCCCGCTCTAGACCTAGGACCGGATCAACT |
| pLSmP-AG-r | GTCCCTCGACGAATTGTCGGTTCACGCAATG |
| *Enhancer/Barcode association primers:* | |
| pLSmP-ass-F | AATGATACGGCGACCACCGAGATCTACACCAGCCTGCATTTCTGCCAGGG |
| pLSmP-ass-R-i# | CAAGCAGAAGACGGCATACGAGAT*10bpIndx*CACGAAGTTATTAGGTCCCTCGAC |
| pLSmP-AG-seqR1 | CAGGGCCCGCTCTAGACCTAGGACCGGATCAACT |
| pLSmP-AG-seqIndx | ACCGACAATTCGTCGAGGGACCTAATAACTTCG |
| pLSmP-AG-seqR2 | TAGGTCCCTCGACGAATTGTCGGTTCACGCAATG |
| *qPCR primers used for DNA titration:* | |
| Genomic.F | TCCTCCGGAGTTATTCTTGGCA |
| Genomic.R | CCCCCCATCTGATCTGTTTCAC |
| WPRE.F | TACGCTGCTTTAATGCCTTTG |
| WPRE.R | GGGCCACAACTCCTCATAAAG |
| 2-LTR.F | GAGTCCTGCGTCGAGAGAGC |
| 2-LTR.R | AACTAGGGAACCCACTGCTTAAG |
| *Barcode readout primers (pLSmP-ass-R-i# and pLSmP-AG-seqIndx are also reused for this):* | |
| BARCODE_lentiF_v4.1 | AATGATACGGCGACCACCGAGATCTACACCTCGGCATGGACGAGCTGTACAAGTAG |
| BARCODE-SEQ-R1-V4 | CTCGGCATGGACGAGCTGTACAAGTAGGAATTC |
| BARCODE-SEQ-R2-V4 | AGGTCCCTCGACGAATTGTCGGTTCACGCAATG |
