# Supplementary material for: A systematic comparison reveals substantial differences in chromosomal versus episomal encoding of enhancer activity
Source: HighWire-hosted journal article supplement (doi:10.1101/gr.212092.116), 2016-11-09
Supplement: Supplemental_Table_S5.docx [file Supplemental_Table_S5.docx]

**Supplemental Table S5.** Primers used for cloning 2 negative and 2 positive control sequences in Luciferase Assay experiments.

| **Name** | **Sequence** |
| --- | --- |
| pos1.F | GCTAGCCTCGAGGATATGCAGCTGTCAAGAAAAATGAG |
| pos1.R | TCTAGTGTCTAAGCTAGGAGGAGGGGCTGATACAG |
| pos2.F | GCTAGCCTCGAGGATCGCTTCCGGCCACTTGGCC |
| pos2.R | TCTAGTGTCTAAGCTCTCCCCCGCTGGCTTCCTAC |
| neg1.F | GCTAGCCTCGAGGATCAGGATGCCCTGGCCAGTG |
| neg1.R | TCTAGTGTCTAAGCTCCTATGGATTCAATACTGACTG |
| neg2.F | GCTAGCCTCGAGGATGGGCCAGCGCCTTAAATGAC |
| neg2.R | TCTAGTGTCTAAGCTGAGTCAAGGACATAAGCATGC |
