# Supplementary material for: A systematic comparison reveals substantial differences in chromosomal versus episomal encoding of enhancer activity
Source: HighWire-hosted journal article supplement (doi:10.1101/gr.212092.116), 2016-11-09
Supplement: Supplemental_Table_S6.docx [file Supplemental_Table_S6.docx]

**Supplemental Table S6.** LS-GKM training on 225,327 HepG2 combined ChIP-seq peaks (positive set) and a positive validation set of 10,000 left-out sequences. Training was performed using LS-GKM defaults (DEF, -T 4 -e 0.01) and parameters matching gkm-SVM (GKM, -l 10 -k 6 -d 3 -t 2 -T 4 -e 0.01). Negative sequences were either created by permuting the positive sequence while maintaining dimer-content or used the negative sequence set provided with gkm-SVM.

| **Name** | **TP** | **FN** | **TN** | **FP** | **ACC** | **PPV** | **TPR** | **SPC** |
| --- | --- | --- | --- | --- | --- | --- | --- | --- |
| GKM:pos-neg | 8217 | 1783 | 7557 | 2443 | 78.9% | 77.1% | 82.2% | 75.6% |
| GKM:pos-shuf | 9055 | 945 | 6443 | 3557 | 77.5% | 71.8% | 90.6% | 64.4% |
| DEF:pos-neg | 8631 | 1369 | 8033 | 1967 | 83.3% | 81.4% | 86.3% | 80.3% |
| DEF:pos-shuf | 9190 | 810 | 7042 | 2958 | 81.2% | 75.7% | 91.9% | 70.4% |
